# Supplementary material for: Pentaporphyrin with flexible, chiral nucleosidic linkers: unexpected duality of the physico-chemical properties of its core
Source: Royal Society of Chemistry journal article supplement (doi:10.1039/b106337p), 2001-01-01
Supplement: b106337p.doc [file b106337p.doc]

**Supplementary data**

Selected spectroscopic data for **4** and **1**.

**4**: UV-VIS max (CH2Cl2)/nm:424 (472700), 551 (18800), 592 (6200). 1H RMN (CDCl3, 300 MHz):  1.52 (s, 18H), 1.53 (s, 36H), 2.12 (s, 3H), 2.14 (s, 3H), 2.30 (m, 2H), 2.83 (td, 2H, 3J=7.2 Hz, 2J=4.4 Hz), 4.22 (t, 2H, 3J=6.0 Hz), 4.38 (m, 1H, 3J=3.4 Hz), 4.42 (dd, 1H, 3J=2.8 Hz, 2J=13.4 Hz), 4.50 (dd, 1H, 3J=3.4 Hz, 2J=12.5 Hz), 5.38 (dd, 1H, 3J=5.9 Hz, 3J=4.6 Hz), 5.42 (dd, 1H, 3J=5.9 Hz, 3J=2.7 Hz), 6.00 (d, 1H, 3J=4.4 Hz), 7.16 (d, 2H, 3J=8.8 Hz), 7.68 (d, 2H, 3J=8.1 Hz), 7.79 (t, 3H, 4J=2.0 Hz), 7.82 (d, 2H, 3J=8.6 Hz), 7.84 (s, 1H), 8.09 (d, 2H), 8.09 (d, 2H, 3J=8.5 Hz), 8.10 (d, 4H, 4J=2.0 Hz), 8.94 (d, 2H, 3J=4.6 Hz), 8.99 (d, 2H, 3J=4.6 Hz), 9.00 (s, 4H), 9.90 (s, 1H). Anal. Calc. for C94H100N6O11Zn.H2O: C, 71.8; H,  6.5; N 5.3. Found: C, 72.1; H, 6.8; N, 4.9. MS (FAB+): *m/z* = 1554.8 ([M]+, calc. 1555.3). **1**: UV-VIS max (CH2Cl2)/nm: 425 (1255000), 518 (29200), 555 (66800), 596 (34000), 647 (9700). MS (FAB+): *m/z* = 6411.6 ([M]+, calc. 6411.3).
